# Supplementary material for: Differential functional consequences of GRIN2A mutations associated with schizophrenia and neurodevelopmental disorders
Source: Springer Nature journal article supplement (doi:10.1038/s41598-024-53102-3), 2024-02-02
Supplement: MOESM1 [file 41598_2024_53102_MOESM1_ESM.pdf]

# **Differential functional consequences of *GRIN2A* mutations associated with schizophrenia and neurodevelopmental disorders**

Nate Shepard<sup>1</sup>, David Baez-Nieto<sup>1</sup>, Sumaiya Iqbal<sup>2</sup>, Erkin Kurganov<sup>1</sup>, Nikita Budnik<sup>1</sup>, Arthur J. Campbell<sup>1</sup>, Jen Q Pan<sup>1</sup>, Morgan Sheng<sup>1,3\*</sup>, Zohreh Farsi<sup>1\*</sup>

<sup>1</sup>Stanley Center for Psychiatric Research, Broad Institute of MIT and Harvard, Cambridge, MA, USA

<sup>2</sup>The Center for the Development of Therapeutics, Broad Institute of MIT and Harvard, Cambridge, MA, USA

<sup>3</sup>Department of Brain and Cognitive Sciences, Massachusetts Institute of Technology, Cambridge, MA, USA

\*Correspondence: [msheng@broadinstitute.org](mailto:msheng@broadinstitute.org) and [zfarsi@broadinstitute.org](mailto:zfarsi@broadinstitute.org).

Figure S1

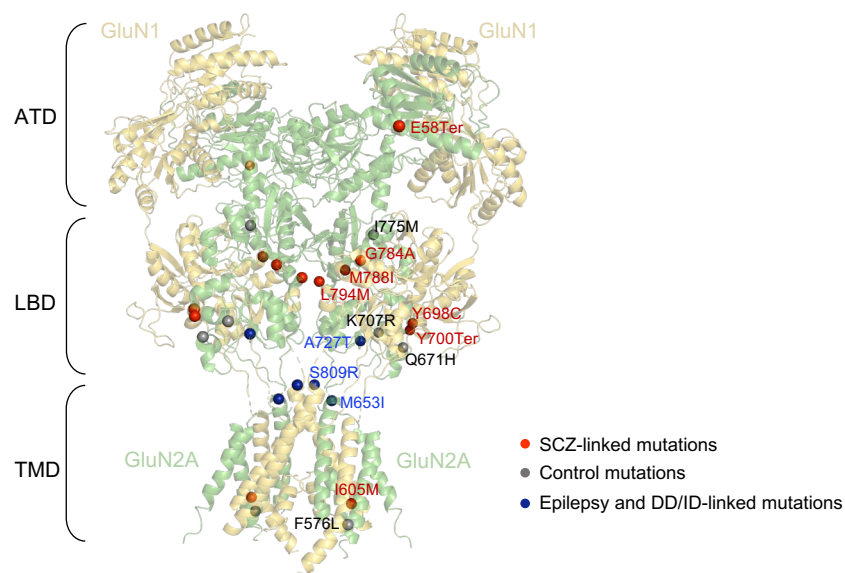

**Figure S1. *GRIN2A* mutations mapped on human NMDAR structure.** Protein structure of human NMDAR (PDB ID 6IRH) with two GluN1 (light yellow) and two GluN2A (light green) subunits. *GRIN2A* mutations associated with SCZ (red) or epilepsy/DD/ID (blue) as well as control mutations (dark gray) are mapped on the two GluN2A subunits of human NMDAR. Two SCZ-associated missense mutations (Q811P, G591R), one control mutation (R586K), one DD/ID-linked mutation (L812M) as well as mutations within the CTD were not mapped due to no structure coverage.

Figure S2

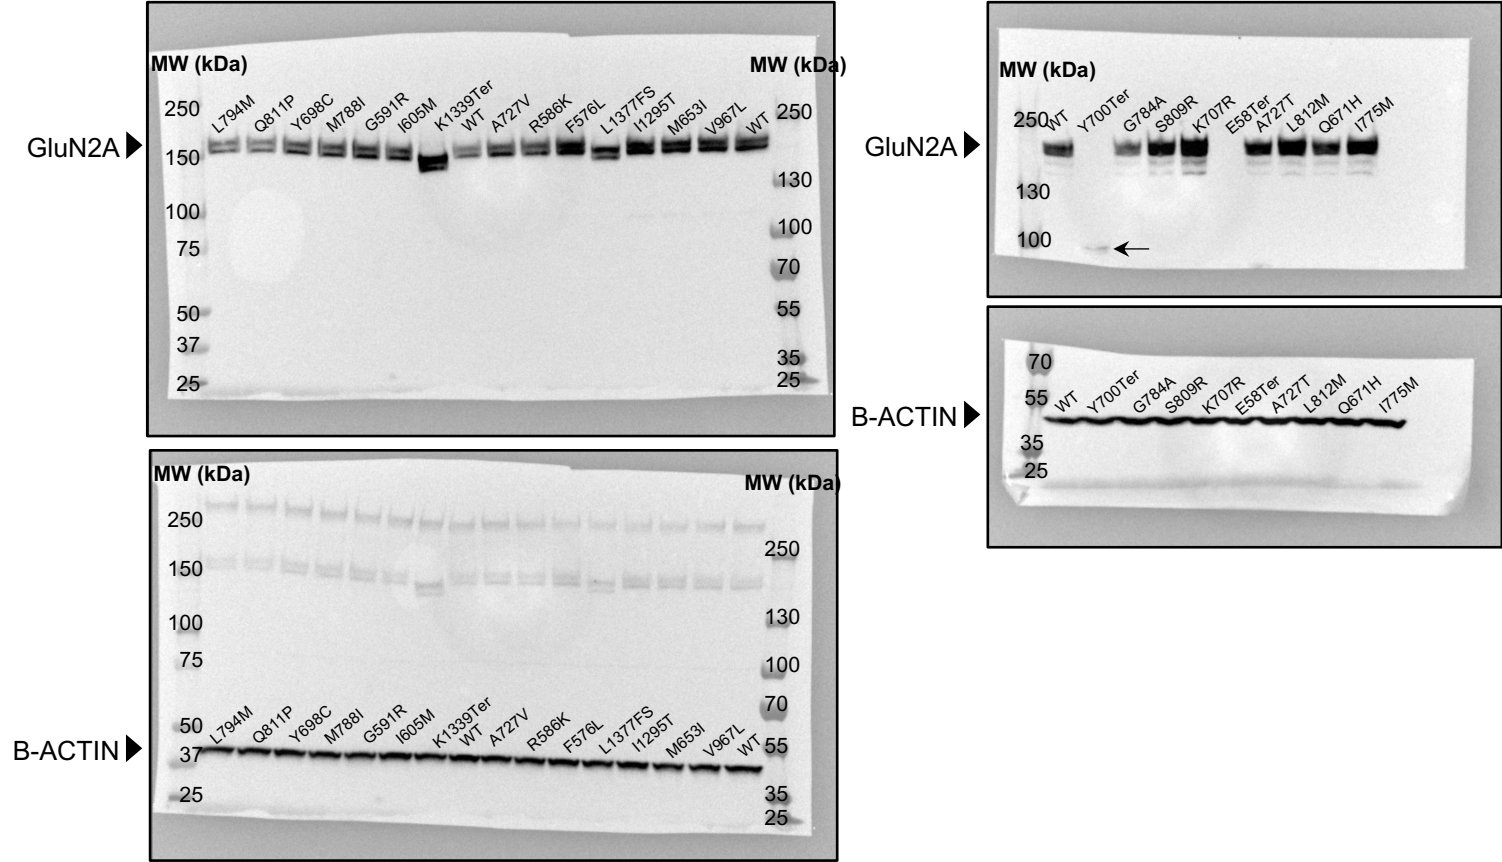

**Figure S2. Uncropped western blot images of GluN2A variants.** Western blots probing for GluN2A and  $\beta$ -ACTIN in lysates of HEK cells transiently transfected with GRIN1-GRIN2A constructs to express wild-type or mutant NMDARs. The arrow in Y700Ter lane indicates a faint band near the expected size for the Y700Ter fragment (~ 80 kDa).

**Figure S3**

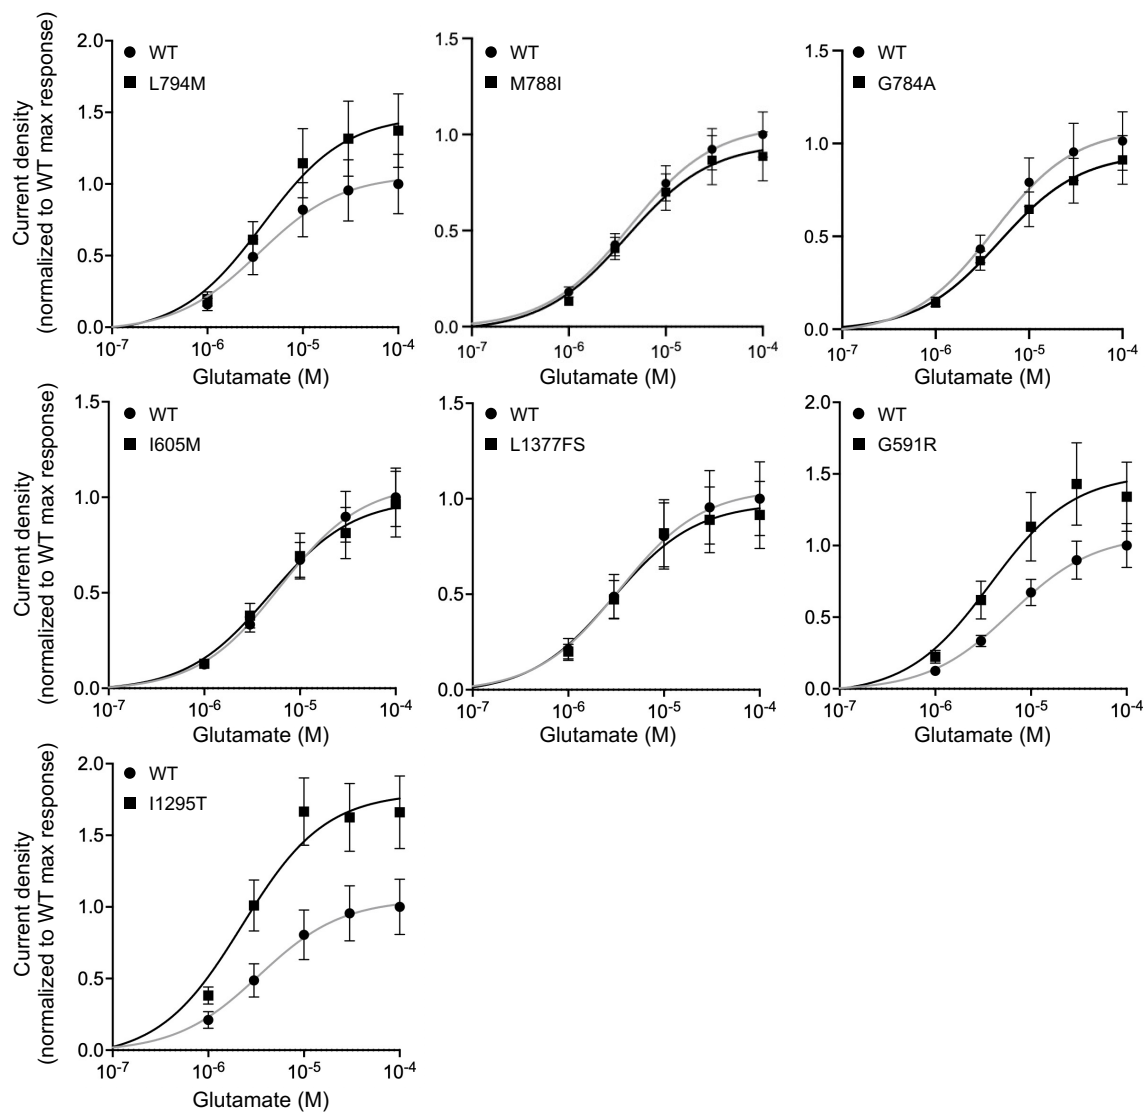

**Figure S3. Effect of SCZ-associated *GRIN2A* variants on NMDAR function.** Averaged current density in response to increasing concentrations of glutamate in the constant presence of 30  $\mu$ M glycine, normalized to maximal response, for NMDARs containing the wild-type or SCZ-associated GluN2A variants. The lines indicate a nonlinear regression three-parameter fit to each dataset. Data are displayed as mean  $\pm$  SEM, n = 31-81; see Table 1 for number of cells recorded per variant.

**Figure S4**

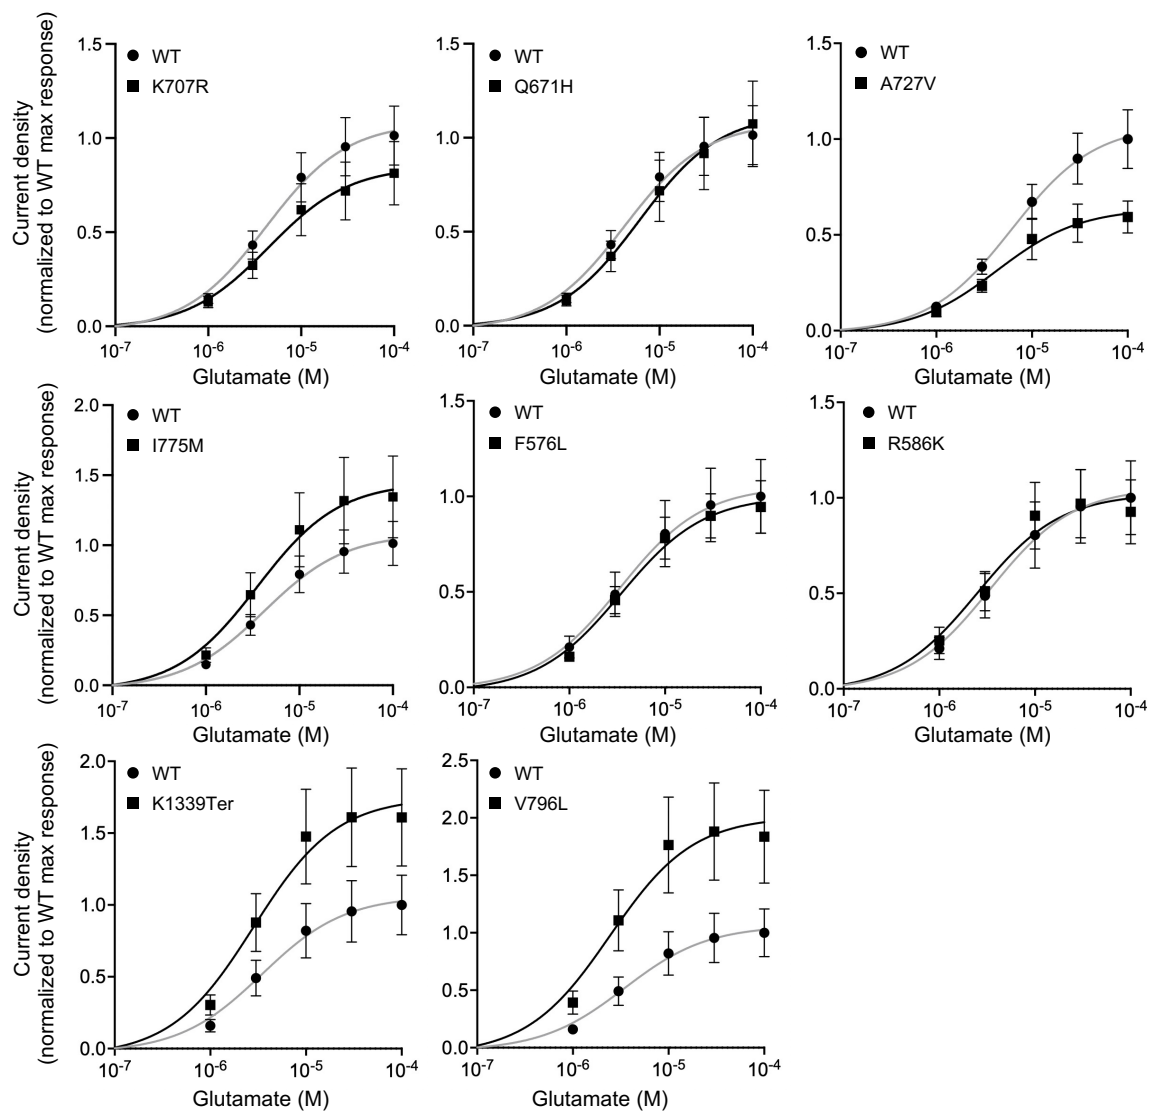



**Figure S4. Effect of non-pathogenic *GRIN2A* variants on NMDAR function.** Averaged current density in response to increasing concentrations of glutamate in the constant presence of 30  $\mu$ M glycine, normalized to maximal response, for NMDARs containing the wild-type or non-pathogenic GluN2A variants. The lines indicate a nonlinear regression three-parameter fit to each dataset. Data are displayed as mean  $\pm$  SEM, n = 17-70; see Table 1 for number of cells recorded per variant.

**Figure S5**

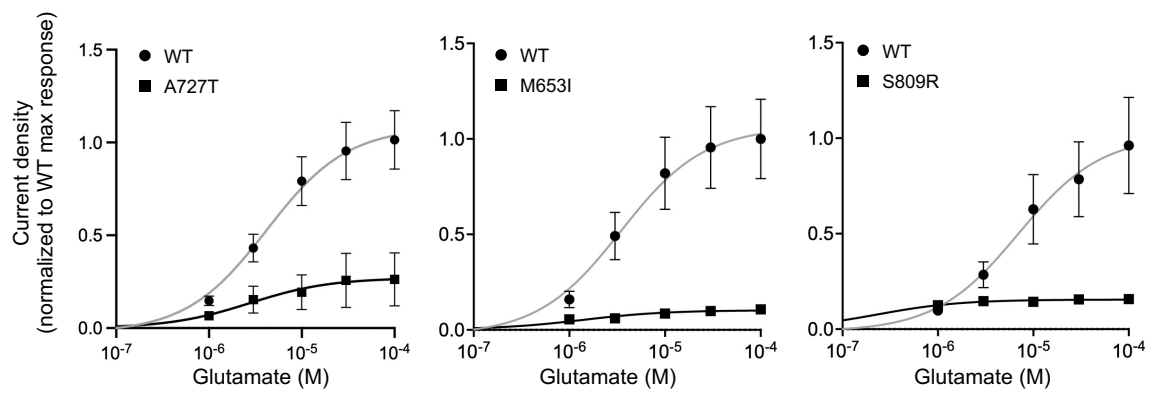

**Figure S5. Effect of Epilepsy and DD/ID-associated *GRIN2A* variants on NMDAR function.**

Averaged current density in response to increasing concentrations of glutamate in the constant presence of 30  $\mu$ M glycine, normalized to maximal response, for NMDARs containing the wild-type or Epilepsy and DD/ID-linked GluN2A variants. The lines indicate a nonlinear regression three-parameter fit to each dataset. Data are displayed as mean  $\pm$  SEM, n = 10-77; see Table 1 for number of cells recorded per variant.

**Figure S6**

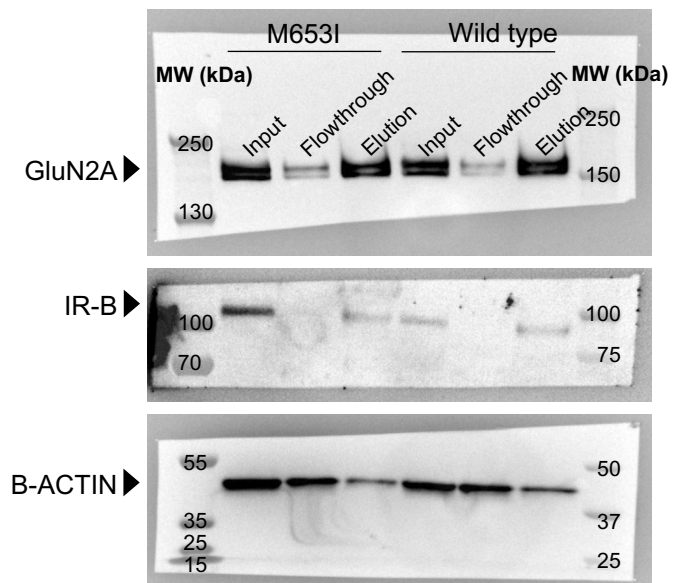

**Figure S6. Original western blot images of the surface biotinylation experiment.** Western blot probing for GluN2A, insulin receptor beta, and  $\beta$ -ACTIN in the input, flowthrough, and elution samples of surface biotinylation experiment done on HEK cells transiently transfected with *GRIN1-GRIN2A* constructs to express wild-type or M653I mutant NMDARs. Input, flowthrough, and elution represent total, internal, and surface expression respectively. IR-B: insulin receptor beta.
